# Supplementary material for: Lats kinase is involved in the intestinal apical membrane integrity in the nematodeCaenorhabditis elegans
Source: Oxford University Press journal article supplement (doi:10.1242/dev.035485), 2009-07-16
Supplement: dev035485tables1.pdf [file dev035485tables1.pdf]

**Table S1. *wts-1* phenotype of *wts-1* mutant and *wts-1* RNAi animals****A. *wts-1* phenotype in control and *wts-1(ok753)* mutant animals**

| Genotype  |  | Control                                    | Mutant              |
|-----------|--|--------------------------------------------|---------------------|
|           |  | <i>dpy-5(e61) daf-16(m26) unc-75(e950)</i> | <i>wts-1(ok753)</i> |
| Phenotype |  |                                            |                     |
| Emb       |  | 1 (1%)                                     | 31 (8%)             |
| Lva       |  | 0 (0%)                                     | 332 (92%)           |
| <i>n</i>  |  | 193                                        | 363                 |

**B. *wts-1* phenotype in RNAi animals**

| Genotype  |  | Control   |              | <i>wts-1</i> |              |
|-----------|--|-----------|--------------|--------------|--------------|
|           |  | <i>N2</i> | <i>rrf-3</i> | <i>N2</i>    | <i>rrf-3</i> |
| Phenotype |  |           |              |              |              |
| Emb       |  | 0 (0%)    | 11 (6%)      | 0 (0%)       | 7 (6%)       |
| Lva       |  | 0 (0%)    | 2 (1%)       | 24 (21%)     | 116 (92%)    |
| <i>n</i>  |  | 103       | 196          | 112          | 126          |

To calculate the embryonic and larval lethality of *wts-1*, we checked the phenotype in *wts-1* mutant animals of the progeny of *wts-1(ok753)/dpy-5(e61) daf-16(m26) unc-75(e950)*. Homozygotes of *dpy-5(e61) daf-16(m26) unc-75(e950)* were used as a control.

Emb, Embryonic lethality; Lva, L1 larval arrest.
