# Supplementary material for: Lats kinase is involved in the intestinal apical membrane integrity in the nematodeCaenorhabditis elegans
Source: Oxford University Press journal article supplement (doi:10.1242/dev.035485), 2009-07-16
Supplement: dev035485tables2.pdf [file dev035485tables2.pdf]

**Table S2. Protein markers in control and *wts-1* mutant worms**

|                                                                                       | Control (heterozygotes) |             |             | <i>wts-1(ok753)</i> homozygotes |             |               |
|---------------------------------------------------------------------------------------|-------------------------|-------------|-------------|---------------------------------|-------------|---------------|
| <b>A. GFP::ACT-5 localization in control and <i>wts-1</i> mutant worms</b>            |                         |             |             |                                 |             |               |
| Time                                                                                  | Day 1                   | Day 2       | Day 3       | Day 1                           | Day 2       | Day 3         |
| Apical only                                                                           | 150 (96±2%)             | 157 (97±1%) | 137 (98±2%) | 42<br>(38±12%)                  | 4 (5±2%)    | 0 (0±0%)      |
| Apical + basolateral                                                                  | 5 (3±2%)                | 3 (2±2%)    | 1 (1±2%)    | 65<br>(59±10%)                  | 28 (38±9%)  | 1 (1±2%)      |
| Apical + basolateral + vesicle                                                        | 2 (1±1%)                | 2 (1±2%)    | 1 (1±1%)    | 3 (3±2%)                        | 41 (56±10%) | 67<br>(99±2%) |
| <i>n</i>                                                                              | 157                     | 162         | 139         | 110                             | 73          | 68            |
| <b>B. Intestinal DLG-1::GFP localization in control and <i>wts-1</i> mutant worms</b> |                         |             |             |                                 |             |               |
| Time                                                                                  | Day 1                   | Day 3       | Day 1       | Day 3                           |             |               |
| Normal                                                                                | 77 (99±2%)              | 70 (99±4%)  | 26 (84±12%) | 20 (29±21%)                     |             |               |
| Abnormal                                                                              | 1 (1±2%)                | 1 (1±4%)    | 5 (16±12%)  | 49(71±21%)                      |             |               |
| <i>n</i>                                                                              | 78                      | 71          | 31          | 69                              |             |               |
| <b>C. HMP-1::GFP localization in control and <i>wts-1</i> mutant worms</b>            |                         |             |             |                                 |             |               |
| Time                                                                                  | Day 1                   | Day 3       | Day 1       | Day 3                           |             |               |
| Normal                                                                                | 4 (100±0%)              | 42 (100±0%) | 4 (100±0%)  | 4 (13±3%)                       |             |               |
| Abnormal                                                                              | 0 (0±0%)                | 0 (0±0%)    | 0 (100±0%)  | 31 (86±3%)                      |             |               |
| <i>n</i>                                                                              | 4                       | 42          | 4           | 35                              |             |               |
| <b>D. VHA-6::GFP localization in control and <i>wts-1</i> mutant worms</b>            |                         |             |             |                                 |             |               |
| Time                                                                                  | Day 1                   | Day 3       | Day 1       | Day 3                           |             |               |
| Normal                                                                                | 101                     | 62          | 47          | 63                              |             |               |
| + Vesicle                                                                             | 0                       | 0           | 1           | 3                               |             |               |
| <i>n</i>                                                                              | 101                     | 62          | 48          | 66                              |             |               |
| <b>E. OPT-2::GFP localization in control and <i>wts-1</i> mutant worms</b>            |                         |             |             |                                 |             |               |
| Time                                                                                  | Day 1                   | Day 3       | Day 1       | Day 3                           |             |               |
| Normal                                                                                | 70                      | 61          | 20          | 14                              |             |               |
| + Basolateral                                                                         | 0                       | 0           | 0           | 10                              |             |               |
| <i>n</i>                                                                              | 70                      | 61          | 20          | 24                              |             |               |
| <b>F. NHX-7::GFP localization in control and <i>wts-1</i> mutant worms</b>            |                         |             |             |                                 |             |               |
| Time                                                                                  | Day 1                   | Day 1       | Day 3       |                                 |             |               |
| Apical                                                                                | 0                       | 0           | 0           |                                 |             |               |
| Basolateral                                                                           | 61                      | 31          | 12          |                                 |             |               |
| <i>n</i>                                                                              | 61                      | 31          | 12          |                                 |             |               |
| <b>G. INX-3::GFP localization in control and <i>wts-1</i> mutant worms</b>            |                         |             |             |                                 |             |               |
| Time                                                                                  | Day 1                   | Day 1       | Day 3       |                                 |             |               |
| Apical                                                                                | 0                       | 0           | 0           |                                 |             |               |
| Basolateral                                                                           | >50                     | >50         | 23          |                                 |             |               |
| <i>n</i>                                                                              | >50                     | >50         | 23          |                                 |             |               |
