# Supplementary material for: Lats kinase is involved in the intestinal apical membrane integrity in the nematodeCaenorhabditis elegans
Source: Oxford University Press journal article supplement (doi:10.1242/dev.035485), 2009-07-16
Supplement: dev035485tables3.pdf [file dev035485tables3.pdf]

**Table S3. Summary of exocyst complex RNAi in the *wts-1* mutant**

|                                            | L4440        | <i>sec-3</i> | <i>sec-5</i> | <i>sec-6</i> | <i>sec-8</i> | <i>sec-10</i> | <i>sec-15</i> | <i>exoc-7</i> | <i>exoc-8</i> |
|--------------------------------------------|--------------|--------------|--------------|--------------|--------------|---------------|---------------|---------------|---------------|
| Apical only                                | 7<br>(2%)    | 4<br>(3%)    | 16<br>(7%)   | 24<br>(22%)  | 11<br>(7%)   | 8<br>(4%)     | 3<br>(4%)     | 5<br>(2%)     | 3<br>(2%)     |
| Apical + basolateral                       | 40<br>(10%)  | 24<br>(19%)  | 103<br>(43%) | 53<br>(50%)  | 59<br>(37%)  | 43<br>(20%)   | 25<br>(29%)   | 25<br>(13%)   | 37<br>(17%)   |
| Apical + basolateral +<br>vesicle – mild   | 103<br>(25%) | 47<br>(38%)  | 88<br>(37%)  | 28<br>(26%)  | 56<br>(35%)  | 72<br>(33%)   | 32<br>(37%)   | 48<br>(25%)   | 76<br>(35%)   |
| Apical + basolateral +<br>vesicle – severe | 266<br>(63%) | 48<br>(39%)  | 33<br>(14%)  | 2<br>(2%)    | 34<br>(21%)  | 95<br>(43%)   | 26<br>(30%)   | 117<br>(60%)  | 100<br>(46%)  |
| <i>n</i>                                   | 416          | 123          | 240          | 107          | 160          | 218           | 86            | 195           | 216           |
