# Supplementary material for: Lats kinase is involved in the intestinal apical membrane integrity in the nematodeCaenorhabditis elegans
Source: Oxford University Press journal article supplement (doi:10.1242/dev.035485), 2009-07-16
Supplement: dev035485tables4.pdf [file dev035485tables4.pdf]

**Table S4. Summary of exocyst complex RNAi in N2 wild-type animals**

|                                | L4440        | <i>sec-3</i> | <i>sec-5</i> | <i>sec-6</i> | <i>sec-8</i> | <i>sec-10</i> | <i>sec-15</i> | <i>exoc-7</i> | <i>exoc-8</i> |
|--------------------------------|--------------|--------------|--------------|--------------|--------------|---------------|---------------|---------------|---------------|
| Apical only                    | 121<br>(97%) | 111<br>(97%) | 127<br>(96%) | 93<br>(94%)  | 116<br>(98%) | 130<br>(97%)  | 141<br>(98%)  | 127<br>(99%)  | 102<br>(97%)  |
| Apical + basolateral           | 2<br>(2%)    | 2<br>(2%)    | 2<br>(2%)    | 2<br>(2%)    | 1<br>(1%)    | 2<br>(2%)     | 3<br>(2%)     | 1<br>(1%)     | 2<br>(2%)     |
| Apical + basolateral + vesicle | 2<br>(2%)    | 2<br>(2%)    | 3<br>(2%)    | 3<br>(4%)    | 2<br>(1%)    | 1<br>(1%)     | 1<br>(1%)     | 0<br>(0%)     | 1<br>(1%)     |
| <i>n</i>                       | 125          | 115          | 132          | 98           | 119          | 133           | 145           | 128           | 105           |
